# Supplementary material for: Gut microbiota causally impacts adrenal function: a two-sample mendelian randomization study
Source: PubMed Central journal article supplement — Sci Rep. 2024 Oct 7;14:23338. doi: 10.1038/s41598-024-73420-w (PMC11458771; doi:10.1038/s41598-024-73420-w), 2024-10-07

**Fig S1** The forest plot of MR estimates from gut microbiota on adrenal medulla identified with IVW.

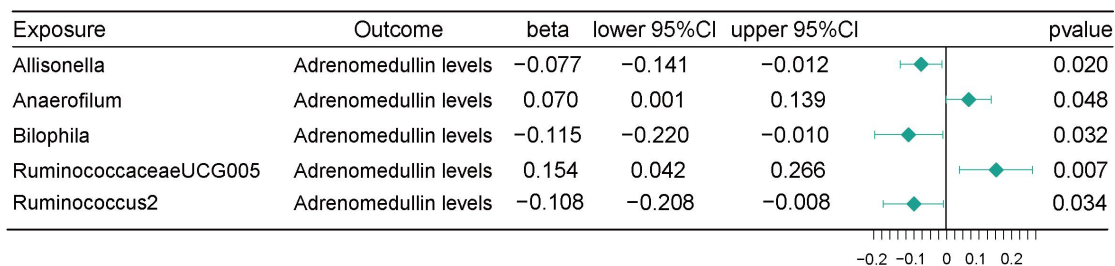

**Fig S2** Forest plot of the significance estimates for the relationship between gut microbiota and the zona glomerulosa of the adrenal cortex, determined through the IVW method.

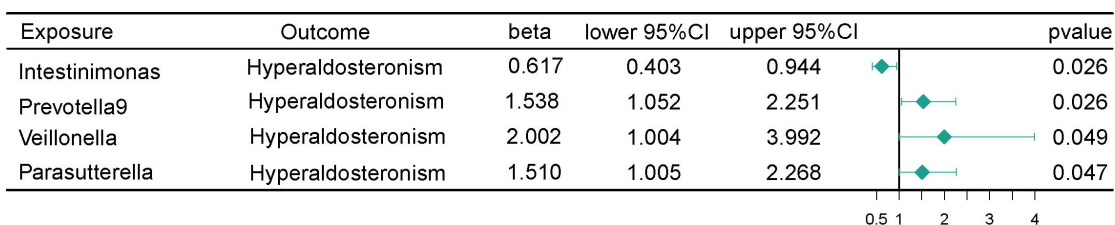

**Fig S3** The forest plot of MR estimates for the relationship between gut microbiota and the zona fasciculata of the adrenal cortex, determined through the IVW method.

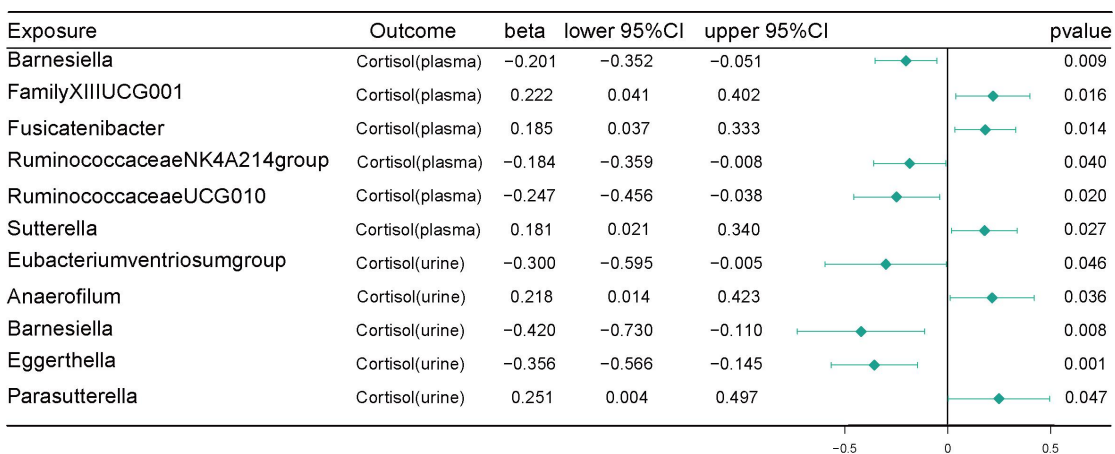

**Fig S4** The forest plot of MR estimates for the relationship between gut microbiota and the zona reticularis of the adrenal cortex, determined through the IVW method.

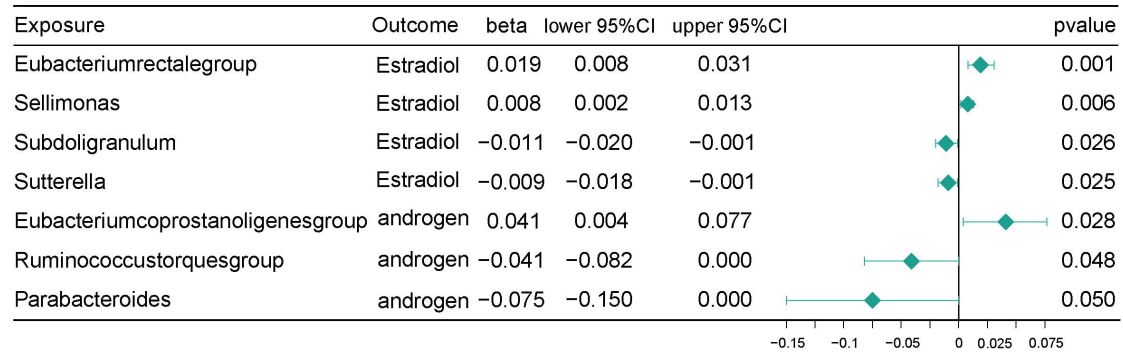

**Fig S5 Scatter plots of MR estimates from genetically predicted portions of gut microbiota on adrenal medulla function.** a, Alisonella and adrenal medulla function; b, Anaerofilum and adrenal medulla function; c, Bilophila and adrenal medulla function; d, RuminococcaceaeUCG005 and adrenal medulla function; e, Ruminococcus2 and adrenal medulla function.

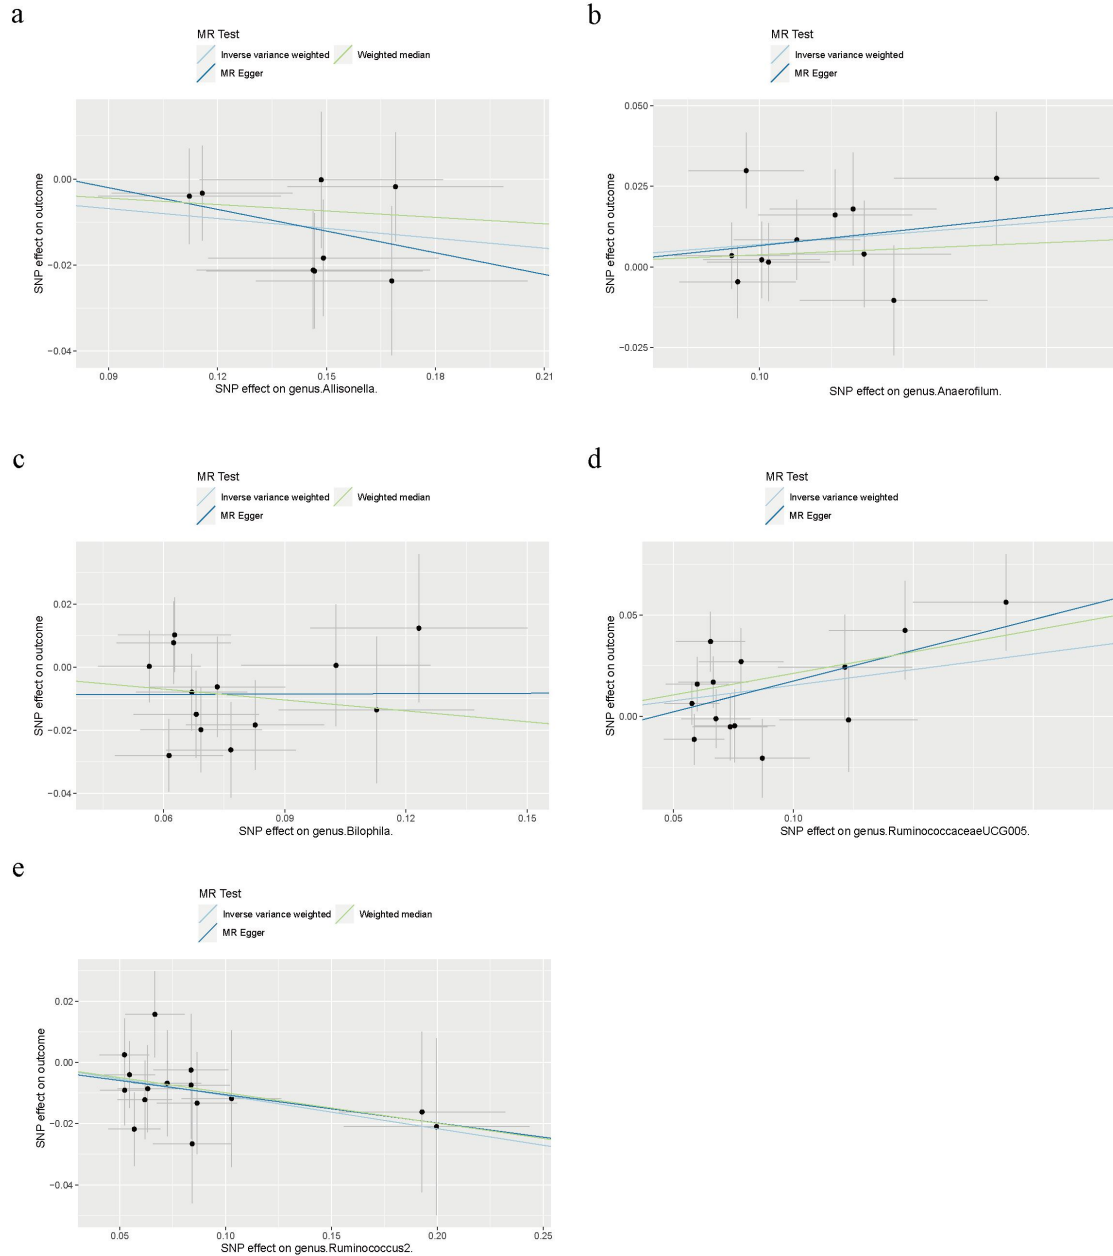

**Fig S6 Scatter plots of MR estimates from genetically predicted gut microbiota on adrenal cortex zona glomerulosa function.** a, Intestinimonas and adrenal cortex zona glomerulosa function; b, Parasutterella and cortex zona glomerulosa function; c, Prevotella9 and adrenal cortex zona glomerulosa function; d, Veillonella and adrenal cortex zona glomerulosa function.

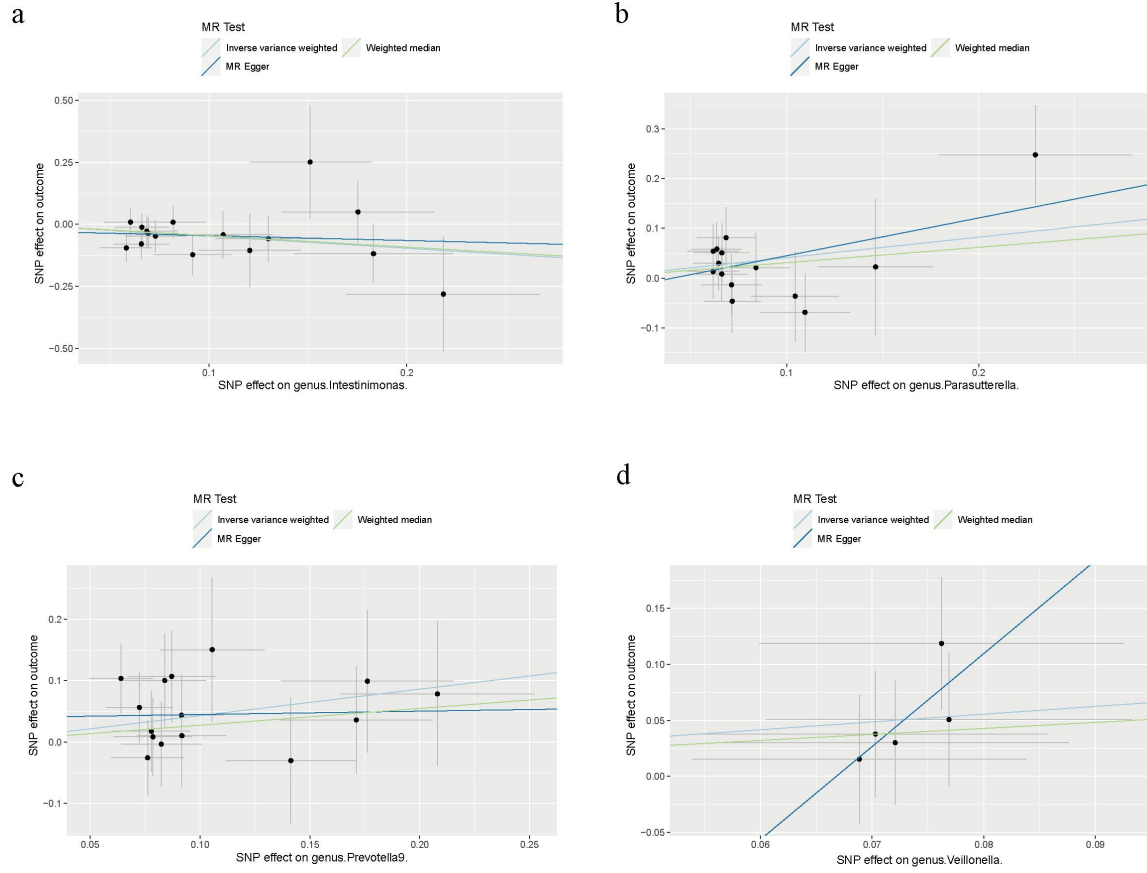

**Fig S7 Scatter plots of MR estimates from genetically predicted gut microbiota on adrenal cortex zona fasciculata function (plasma cortisol).** a, *Barnesiella* and adrenal cortex zona fasciculata function; b, *FamilyXIIIUCG001* and adrenal cortex zona fasciculata function; c, *Fusicatenibacterid* and adrenal cortex zona fasciculata function; d, *RuminococcaceaeNK4A214group* and adrenal cortex zona fasciculata function; e, *RuminococcaceaeUCG010* and adrenal cortex zona fasciculata function; f, *Sutterella* and adrenal cortex zona fasciculata function.

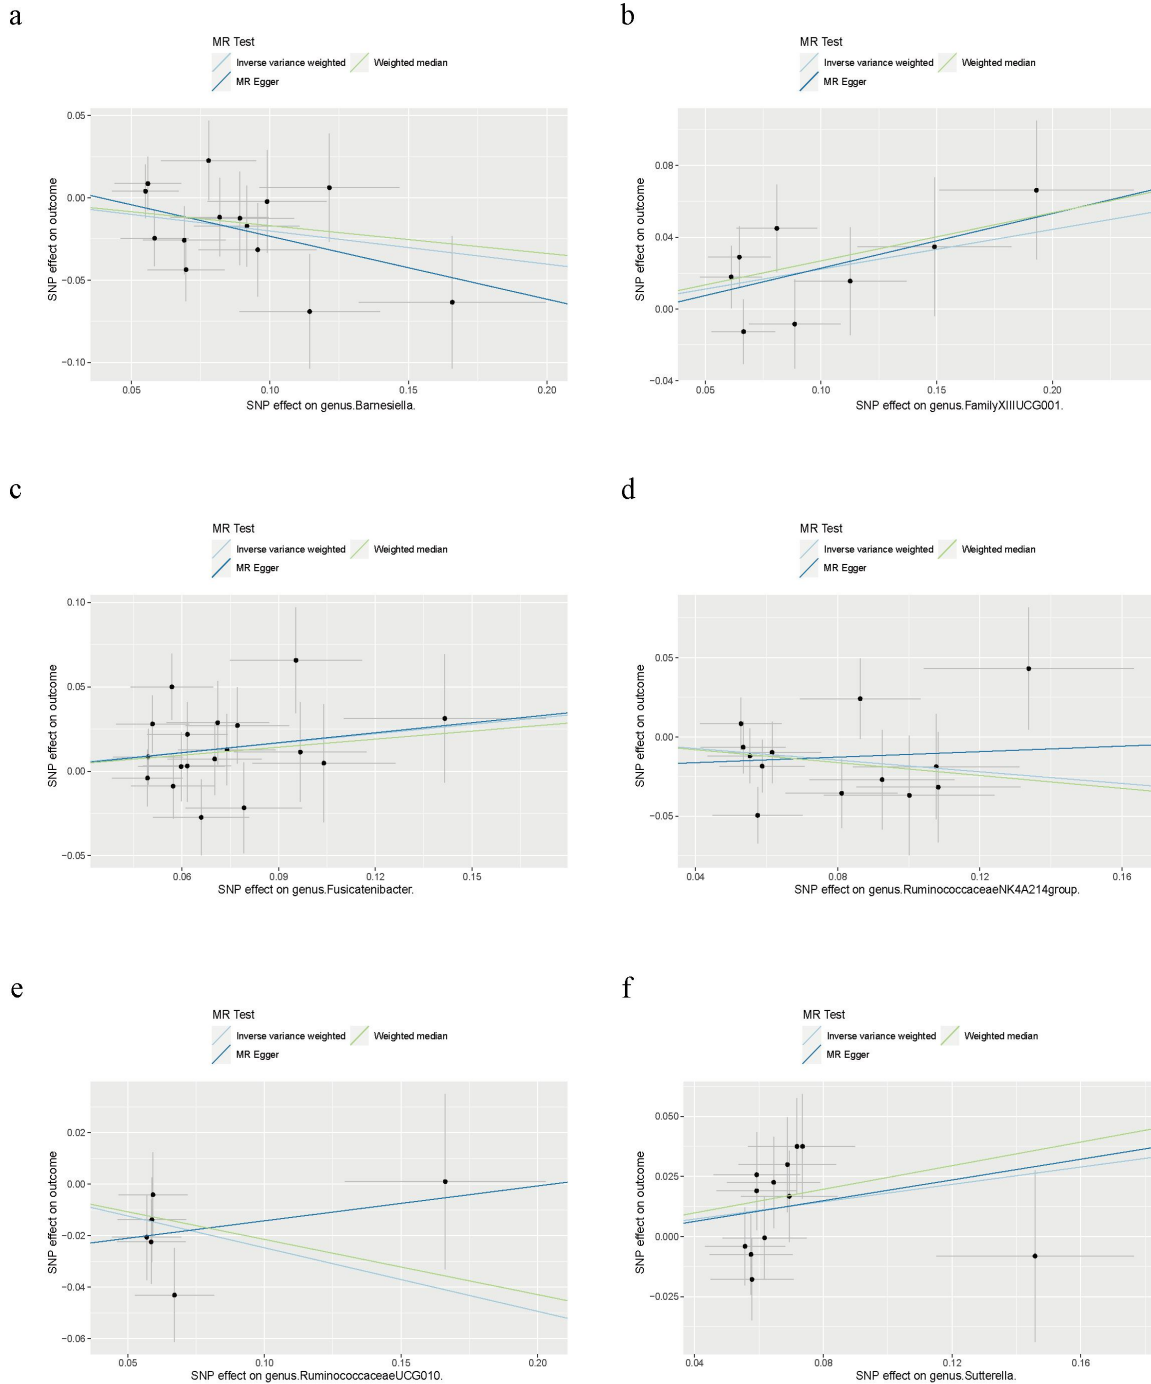

**Fig S8 Scatter plots of MR estimates from genetically predicted gut microbiota on adrenal cortex zona fasciculata function (urine cortisol).** a, *Eubacteriumventriosum* group and adrenal cortex zona fasciculata function; b, *Anaerofilum* and adrenal cortex zona fasciculata function; c, *Barnesiella* and adrenal cortex zona fasciculata function; d, *Eggerthella* and adrenal cortex zona fasciculata function; e, *Parasutterella* and adrenal cortex zona fasciculata function.

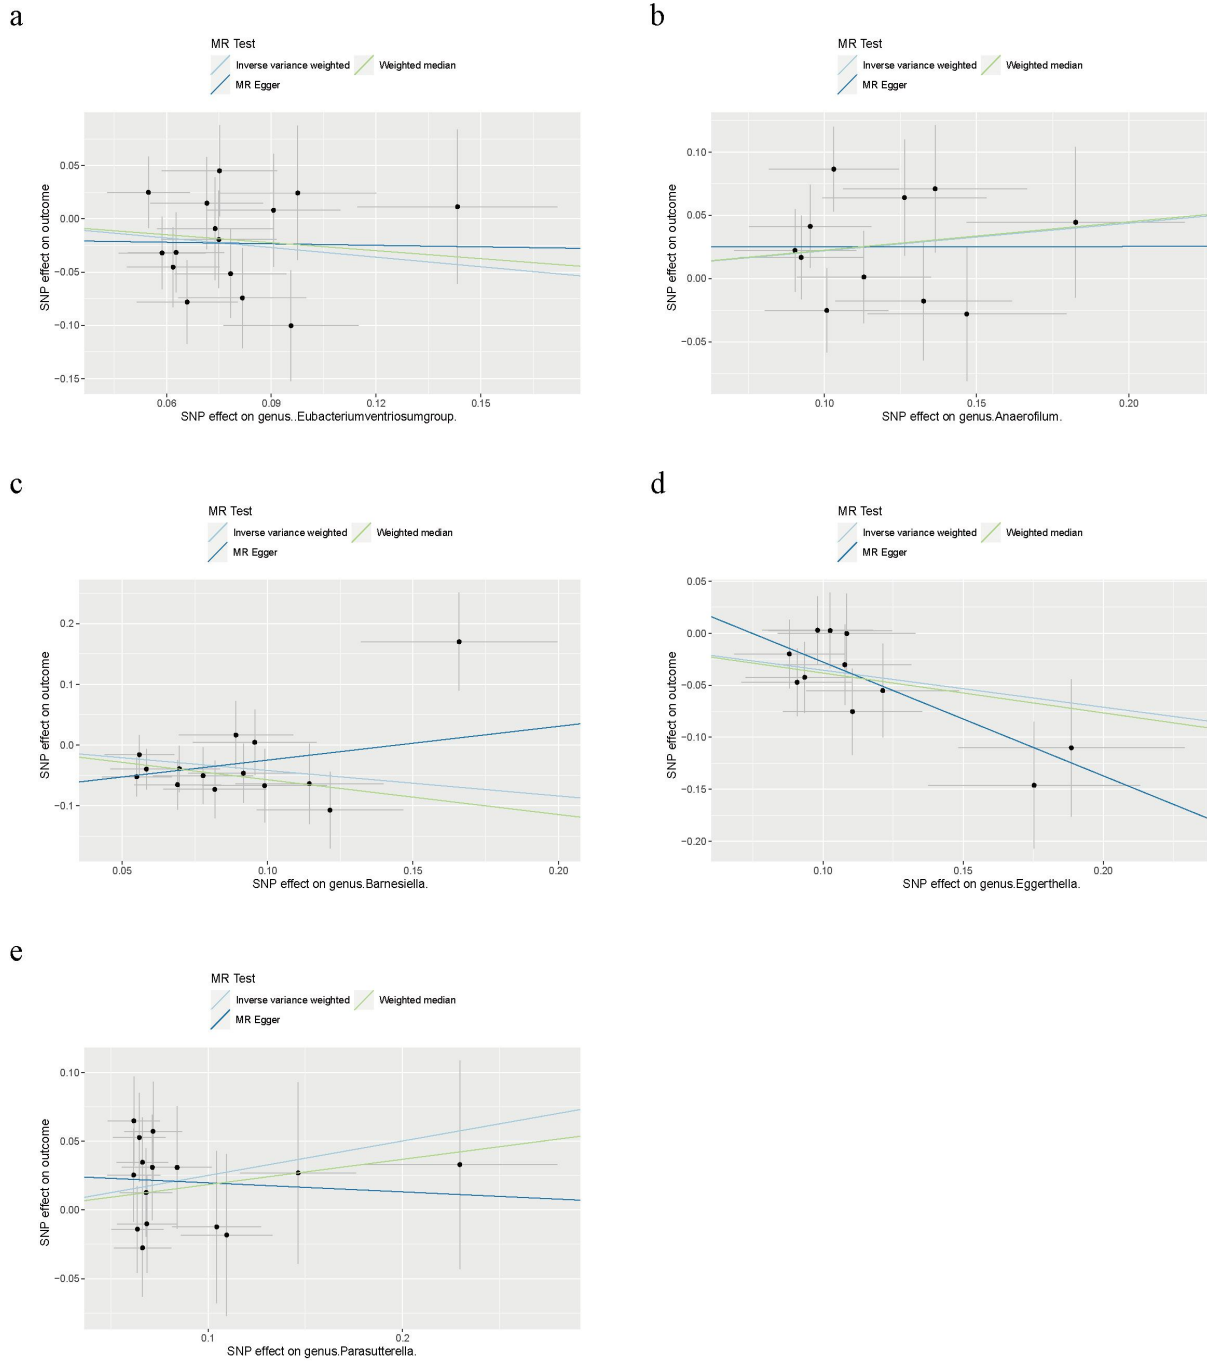

**Fig S9 Scatter plots of MR estimates from genetically predicted gut microbiota on adrenal cortex zona reticularis function (estradiol).** a, *Eubacteriumrectale* group and adrenal cortex zona reticularis function; b, *Selimonas* and adrenal cortex zona reticularis function; c, *Subdoligranulum* and adrenal cortex zona reticularis function; d, *Sutterella* and adrenal cortex zona reticularis function.

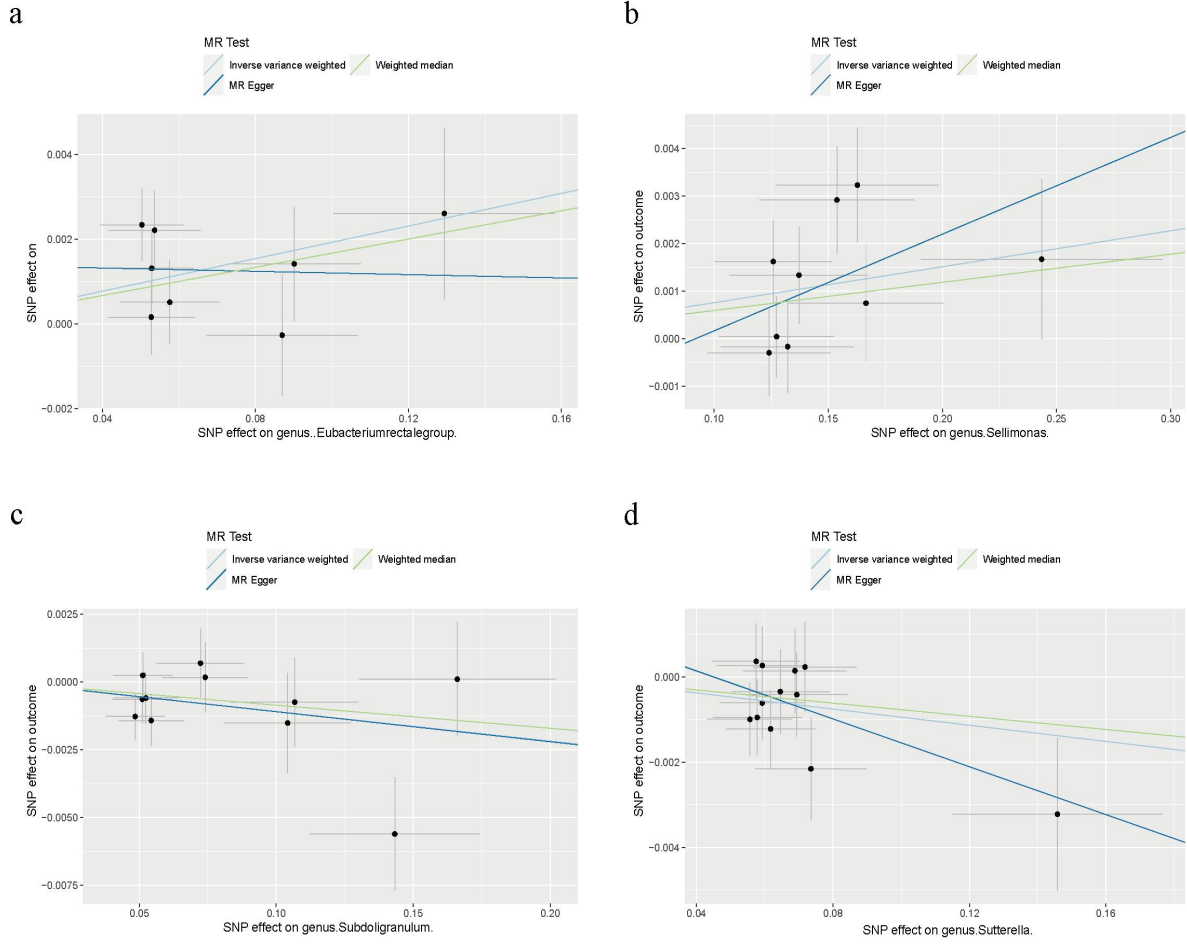

**Fig S10 Scatter plots of MR estimates from genetically predicted gut microbiota on adrenal cortex zona reticularis function (androgen).** a, Eubacteriumcoprostanoligenesgroup and adrenal cortex zona reticularis function; b, Ruminococustorquesgroupid and adrenal cortex zona reticularis function; c, Parabacteroides and adrenal cortex zona reticularis function.

a

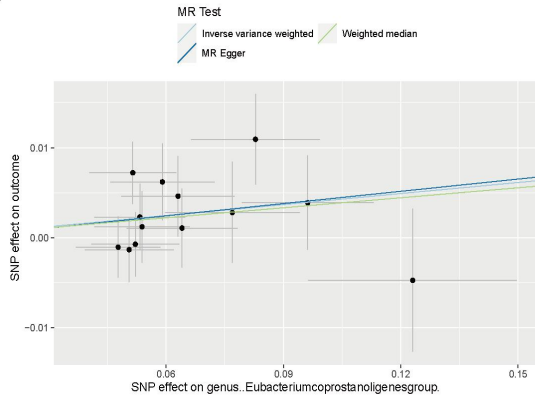

b

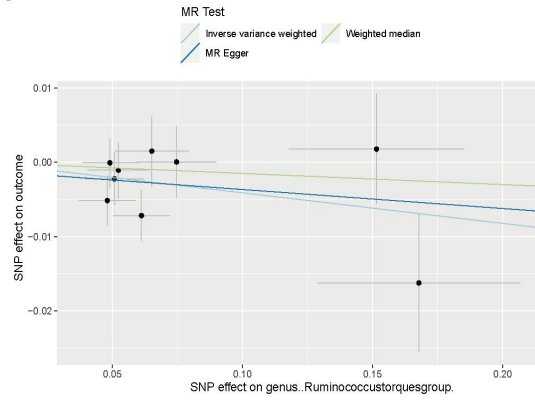

c

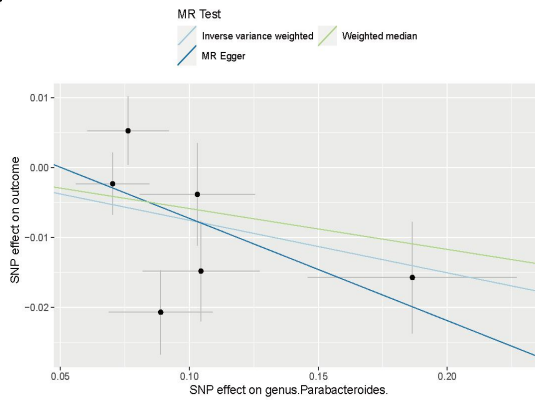



**Fig S11 Funnel plots and Leave-one-out plots of MR estimates from genetically predicted portions of gut microbiota on adrenal medulla function.** a,f, *Alisonella* and adrenal medulla function; b,g, *Anaerofilum* and adrenal medulla function; c,h, *Bilophila* adrenal medulla function; d,i, *RuminococcaceaeUCG005* and adrenal medulla function; e,j, *Ruminococcus2* and adrenal medulla function.

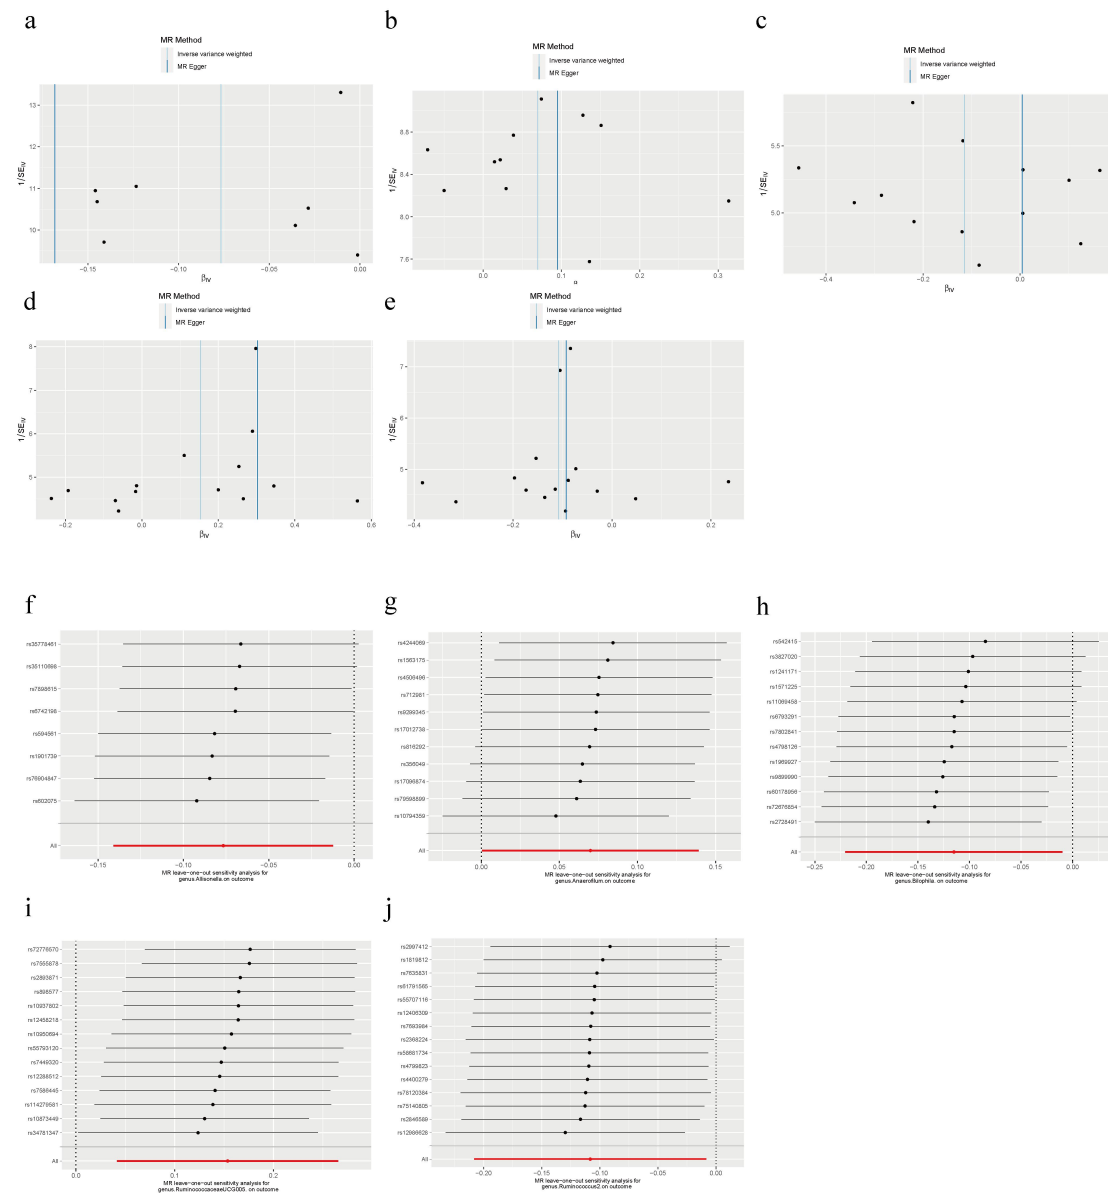

**Fig S12 Funnel plots and Leave-one-out plots of MR estimates from genetically predicted portions of gut microbiota on adrenal cortex zona glomerulosa function.** a,e, *Intestinimonas* and adrenal cortex zona glomerulosa function; b,f, *Parasutterella* and cortex zona glomerulosa function; c,g, *Prevotella9* and adrenal cortex zona glomerulosa function; d,h, *Veillonella* and adrenal cortex zona glomerulosa function.

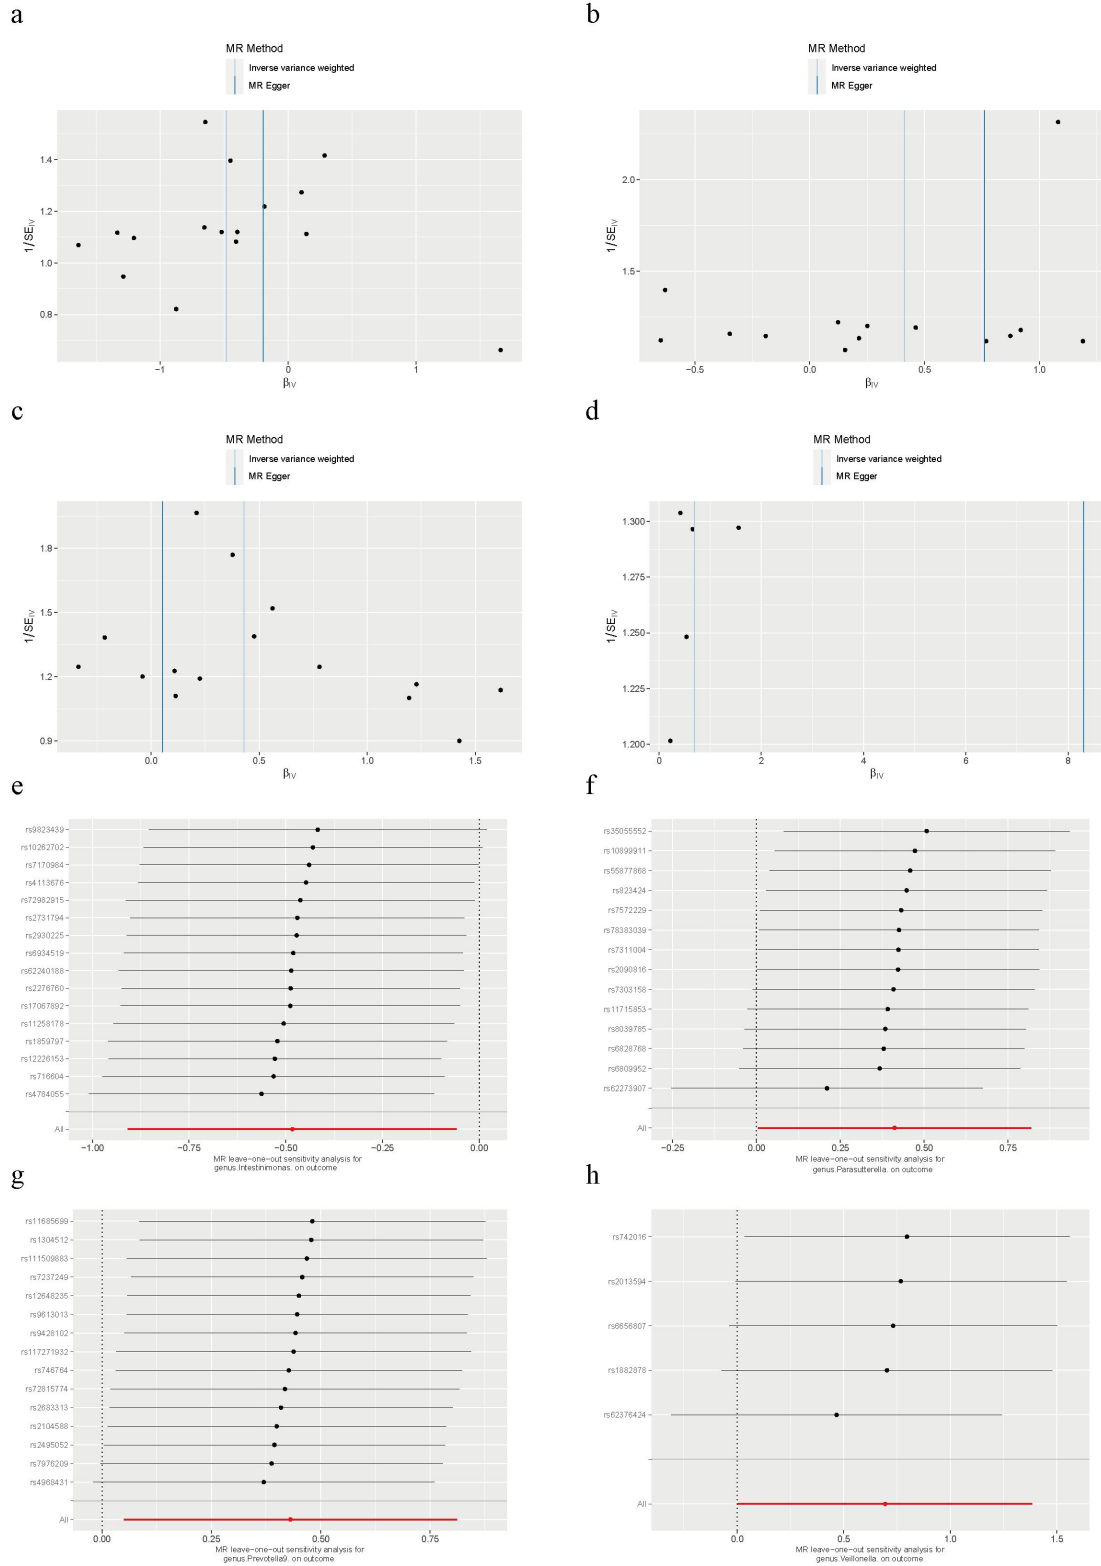

**Fig S13 Funnel plots and Leave-one-out plots of MR estimates from genetically predicted portions of gut microbiota on adrenal cortex zona fasciculata function (plasma cortisol ).** a,g, *Barnesiella* and adrenal cortex zona fasciculata function; b,h, *FamilyXIIIUCG001* and adrenal cortex zona fasciculata function; c,i, *Fusicatenibacterid* and adrenal cortex zona fasciculata function; d,j, *RuminococcaceaeNK4A214group* and adrenal cortex zona fasciculata function; e,k, *RuminococcaceaeUCG010* and adrenal cortex zona fasciculata function; f,l, *Sutterella* and adrenal cortex zona fasciculata function.

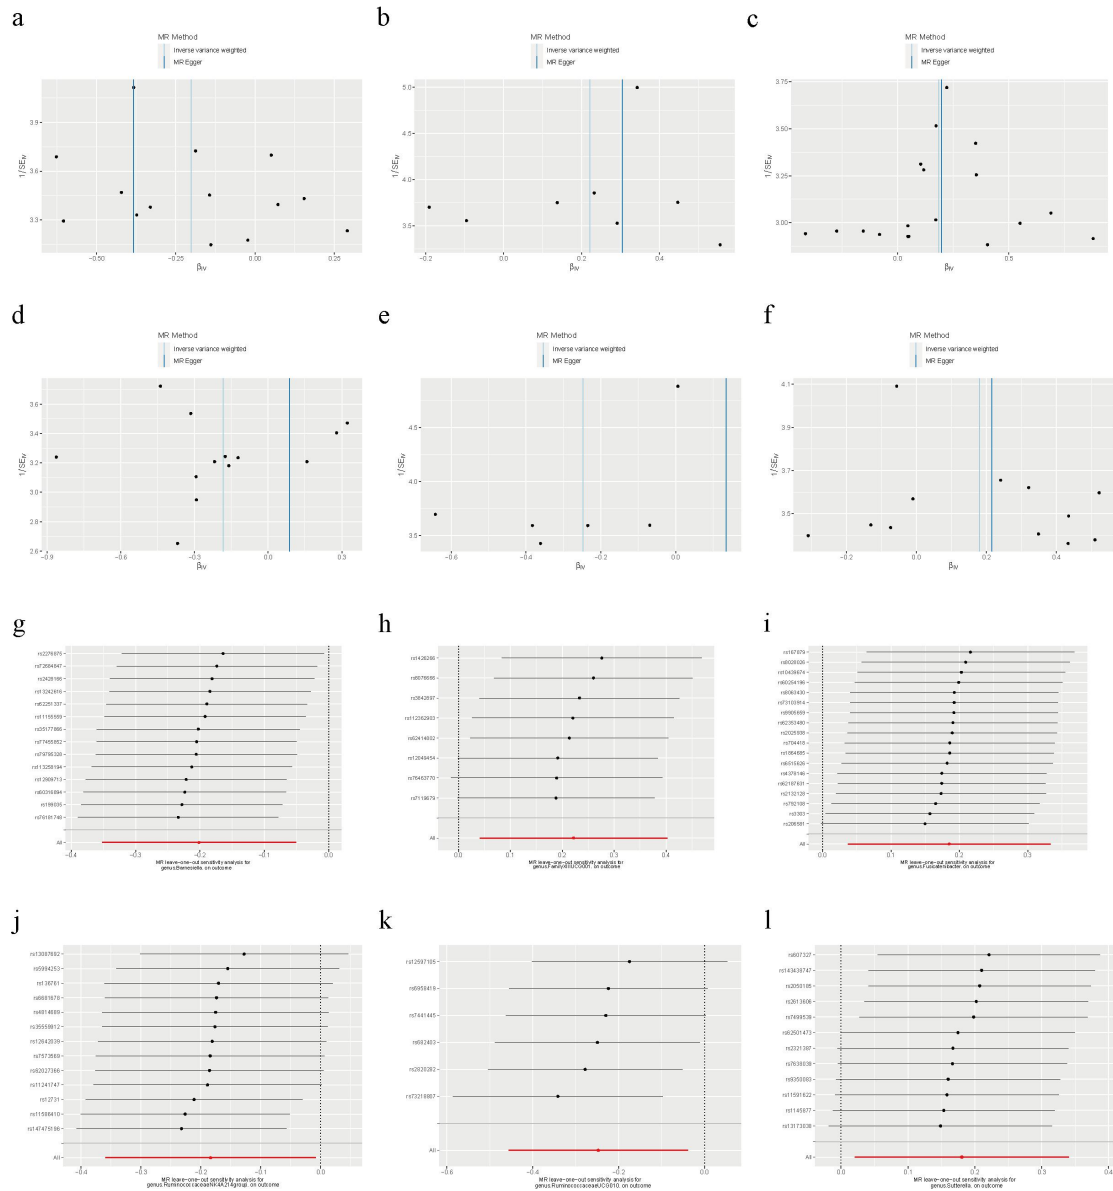

**Fig S14 Funnel plots and Leave-one-out plots of MR estimates from genetically predicted portions of gut microbiota on adrenal cortex zona fasciculata function (urine cortisol).** a,f, Eubacteriumventriosumgroup and adrenal cortex zona fasciculata function; b,g, Anaerofilum and adrenal cortex zona fasciculata function; c,h, Barnesiella and adrenal cortex zona fasciculata function; d,i, Eggerthella and adrenal cortex zona fasciculata function; e,j, Parasutterella and adrenal cortex zona fasciculata function.

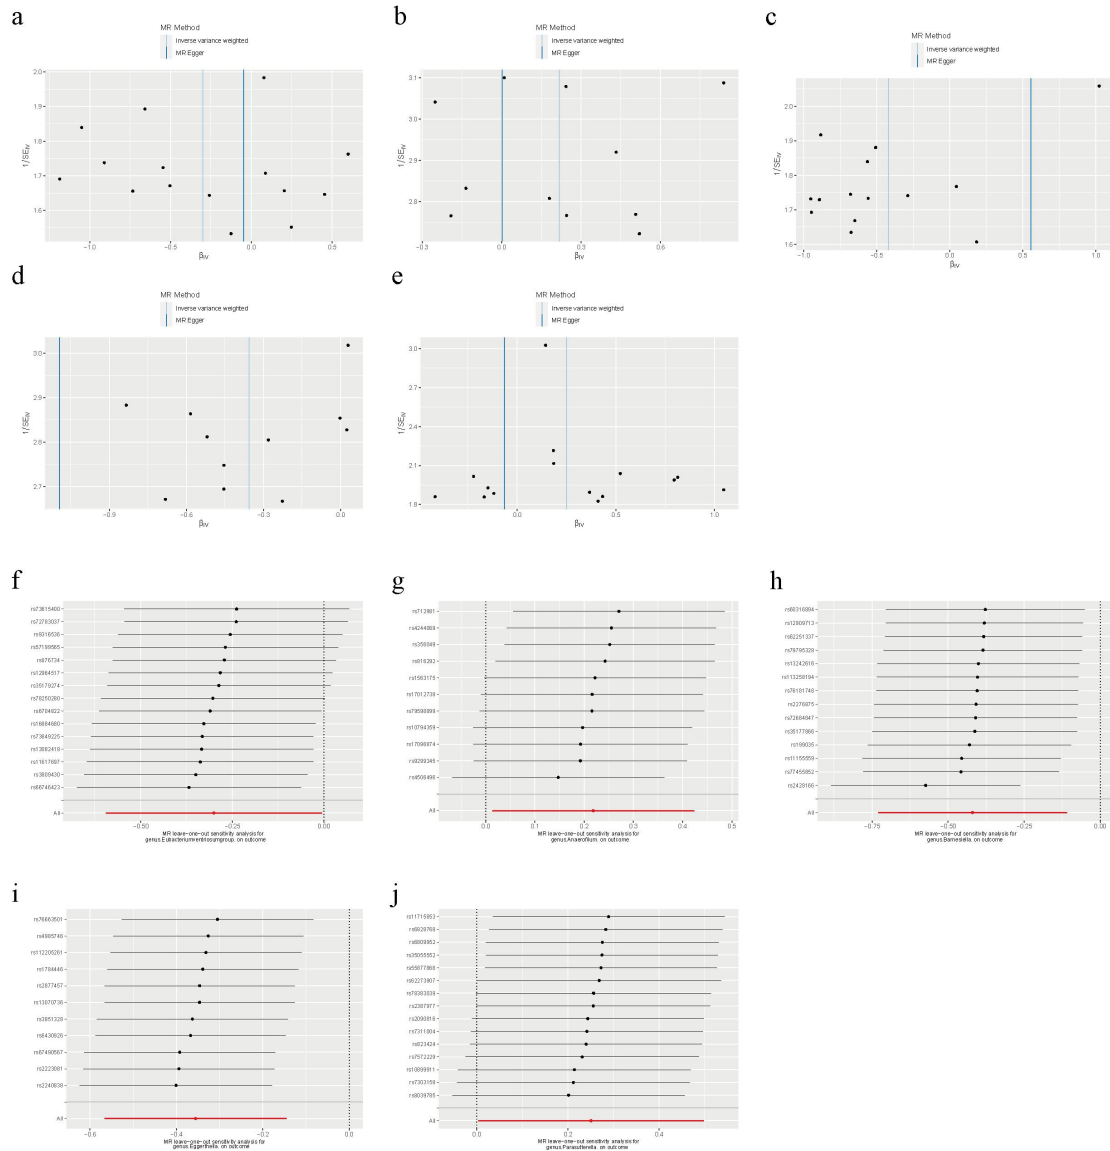

**Fig S15 Funnel plots and Leave-one-out plots of MR estimates from genetically predicted portions of gut microbiota on adrenal cortex zona reticularis function (estradiol).** a,e, Eubacteriumrectalegroup and adrenal cortex zona reticularis function; b,f, Selimonas and adrenal cortex zona reticularis function; c,g, Subdoligranulum and adrenal cortex zona reticularis function; d,h, Sutterella and adrenal cortex zona reticularis function.

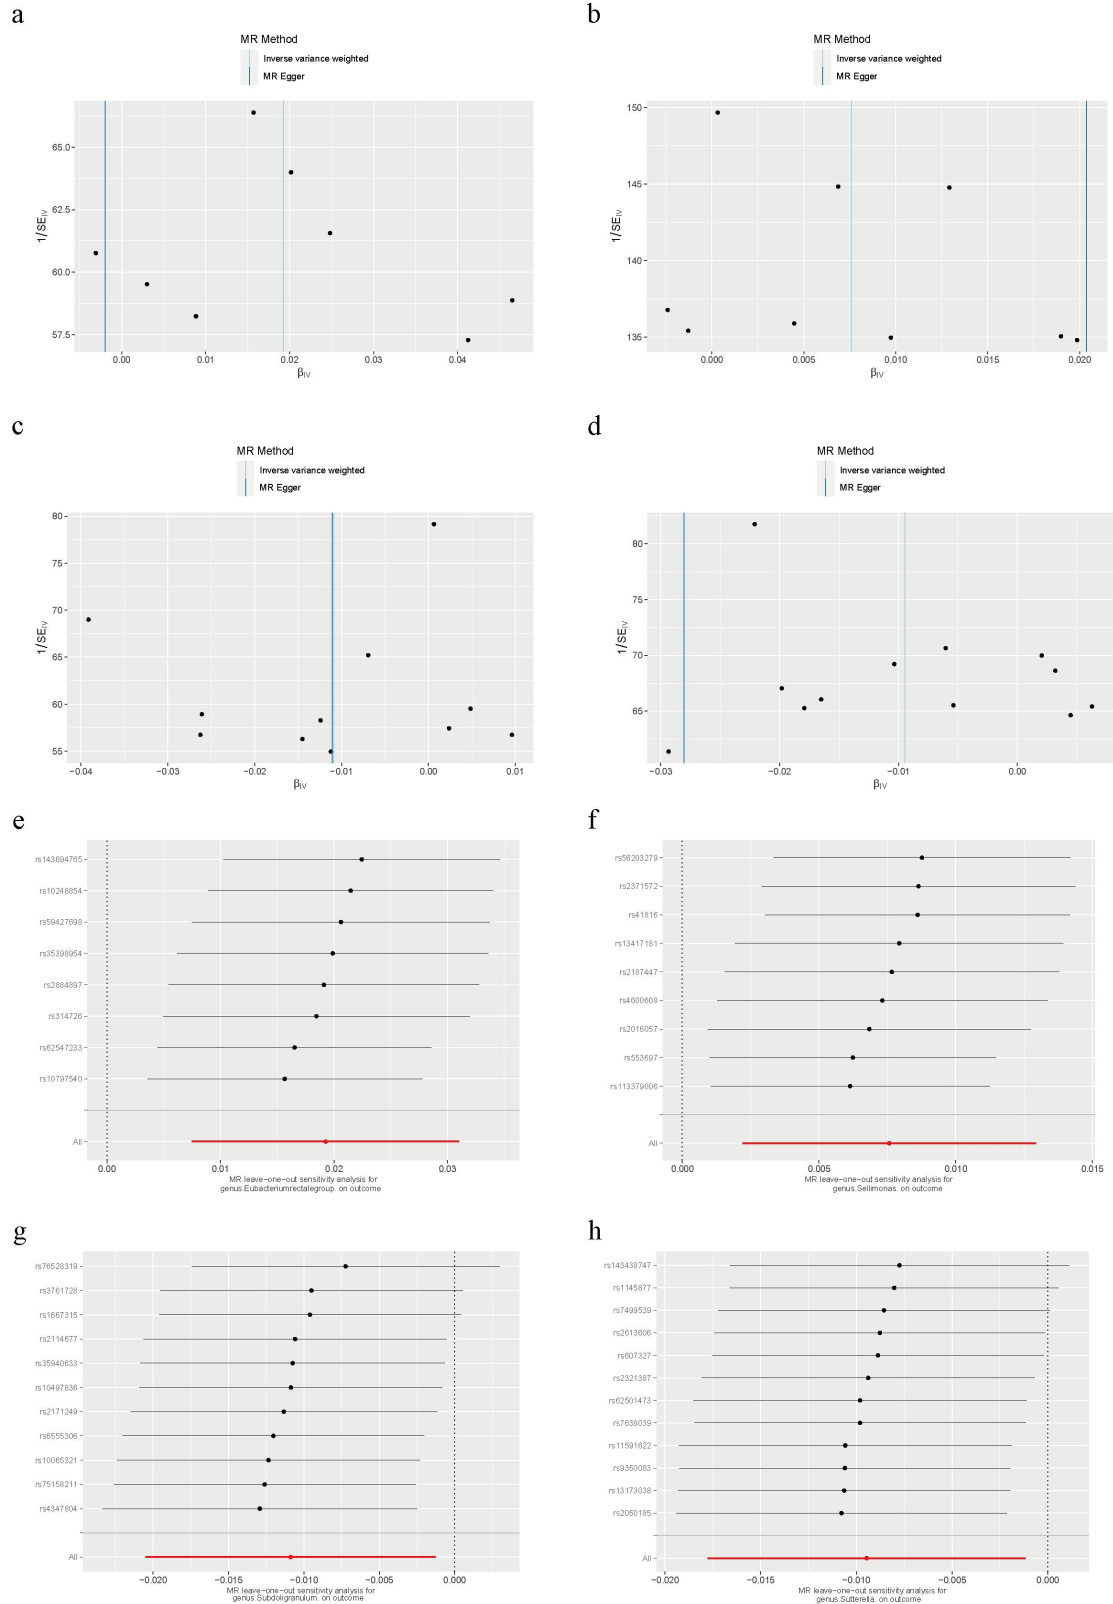

**Fig S16 Funnel plots and Leave-one-out plots of MR estimates from genetically predicted portions of gut microbiota on adrenal cortex zona reticularis function (androgen).** a,d, Eubacteriumcoprostanoligenesgroup and adrenal cortex zona reticularis function; b,e, Ruminococcustorquesgroupid and adrenal cortex zona reticularis function; c,f, Parabacteroides and adrenal cortex zona reticularis function.

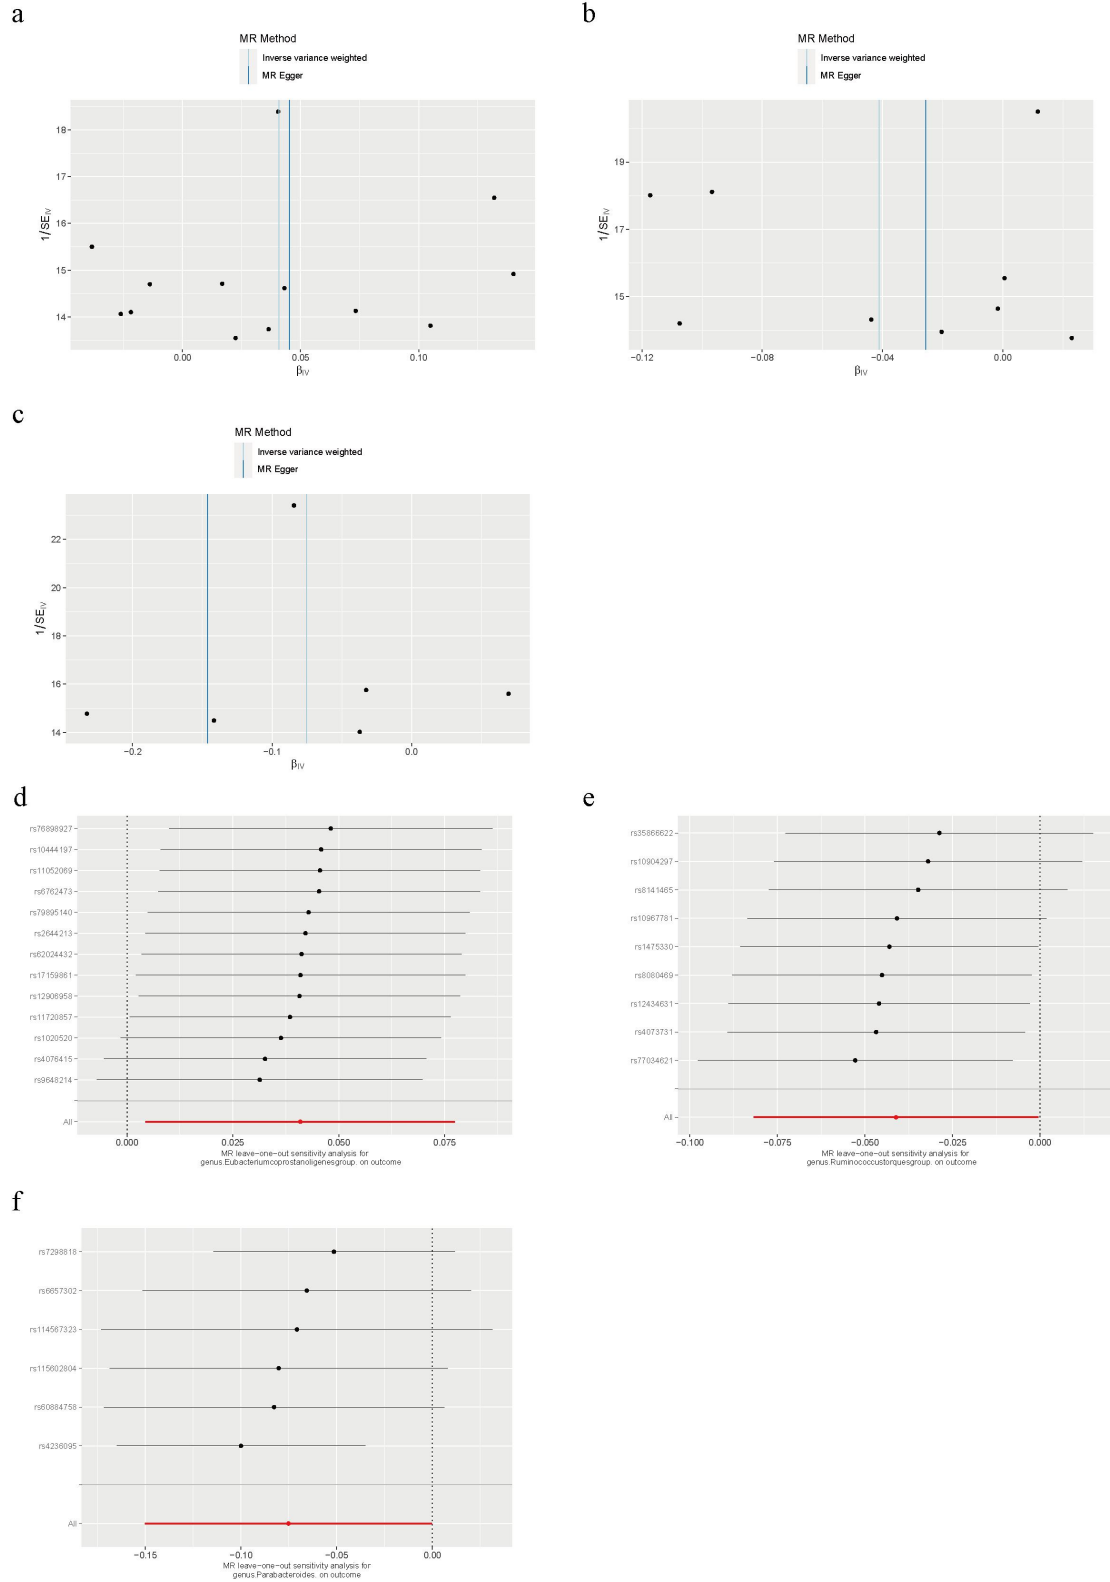

Supplement: 41598_2024_73420_MOESM5_ESM.pdf [file 41598_2024_73420_MOESM5_ESM.pdf]
