# Supplementary material for: Gut microbiota causally impacts adrenal function: a two-sample mendelian randomization study
Source: PubMed Central journal article supplement — Sci Rep. 2024 Oct 7;14:23338. doi: 10.1038/s41598-024-73420-w (PMC11458771; doi:10.1038/s41598-024-73420-w), 2024-10-07
Supplement: 41598_2024_73420_MOESM2_ESM.pdf [file 41598_2024_73420_MOESM2_ESM.pdf]

**Table S1 GWAS summary data utilized in this study**

|                          | Trait                        | Sample N                         | SNPs N   | population                                                                                                                                                                                                                    | Data source                                                                                                  |
|--------------------------|------------------------------|----------------------------------|----------|-------------------------------------------------------------------------------------------------------------------------------------------------------------------------------------------------------------------------------|--------------------------------------------------------------------------------------------------------------|
| Gut microbiome           | Genus                        | 18,340                           | 5717754  | European (16 cohorts, N= 13,266), Middle-Eastern (1 cohort, N = 481), East Asian (1 cohort, N = 811), American Hispanic/Latin (1 cohort N = 1097), African American (1 cohort, N = 114), multi-ancestry (4 cohorts, N = 2571) | MiBioGen consortium; <a href="https://mibiogen.gcc.rug.nl/">https://mibiogen.gcc.rug.nl/</a> (PMID:33462485) |
| Adrenal medulla function | Adrenomedullin levels        | 21758                            | 13106323 | European                                                                                                                                                                                                                      | IEU Open GWAS project <a href="https://gwas.mrcieu.ac.uk/">https://gwas.mrcieu.ac.uk/</a> (PMID: 33067605)   |
| Adrenal cortex function  | Hyperaldosteronism           | Cases:690<br>controls:<br>361988 | 20169937 | European                                                                                                                                                                                                                      | FinnGen consortium R9 <a href="https://www.finngen.fi/en/">https://www.finngen.fi/en/</a>                    |
|                          | Cortisol(plasma) measurement | 4800                             | 7724294  | European                                                                                                                                                                                                                      | GWAS Catalog <a href="https://www.ebi.ac.uk/gwas/">https://www.ebi.ac.uk/gwas/</a> (PMID:37277652)           |
|                          | Cortisol (urine) measurement | 2322                             | 7723412  | European                                                                                                                                                                                                                      | GWAS Catalog <a href="https://www.ebi.ac.uk/gwas/">https://www.ebi.ac.uk/gwas/</a> (PMID:37277652)           |
|                          | Estradiol measurement        | 206972                           | 16582268 | European                                                                                                                                                                                                                      | GWAS Catalog <a href="https://www.ebi.ac.uk/gwas/">https://www.ebi.ac.uk/gwas/</a> (PMID:32042192)           |
|                          | Free androgen index          | 162068                           | 17239132 | British                                                                                                                                                                                                                       | GWAS Catalog <a href="https://www.ebi.ac.uk/gwas/">https://www.ebi.ac.uk/gwas/</a> (PMID:36653534)           |

---

SNP, single nucleotide polymorphism.
